# Supplementary material
Source: MDPI journal article supplement (https://www.mdpi.com/2075-4701/6/11/277)
Supplement: s1 [file s1]

Supplementary Materials: Hot Deformation Behaviour of As-Cast and Homogenized Al0.5CoCrFeNi High Entropy Alloy

Yu Zhang, Jinshan Li, Jun Wang, Sizhe Niu and Hongchao Kou

| 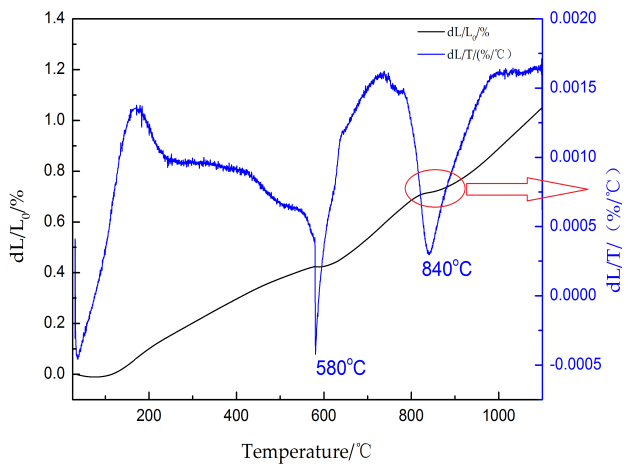 |  |
| --- | --- |
| (**a**) | (**b**) |

**Figure S1.** (**a**) The thermal expansivity curve with temperature (black color) and its differential curve (blue color) of as-cast Al0.5CoCrFeNi HEA at a heating rate of 5 °C/min. (**b**) Partial enlargement drawing of the thermal expansivity curve at *T* = 810–870 °C.
